# Supplementary material
Source: publisher site journal article supplement (https://www.dovepress.com/article/523073)
Supplement: Supplementary file 1 [file Supplementary%20files.docx]

Supplementary Table 1a: Evaluation of malnutrition by Geriatric Nutritional risk index (GNRI)1

| **calculated using the following formula** | **Degree of malnutrition** | | | |
| --- | --- | --- | --- | --- |
| **Normal** | **Mild** | **Moderate** | **Severe** |
| Geriatric Nutritional risk index (GNRI)  = 1.489 x serum albumin (g/dL) + 41.7 x (body weight in kilograms / ideal body weight)  (ideal body weight = 22 x square of height in meters) | >98 | 92-98 | 82-91 | <82 |

1. Bouillanne O, Morineau G, Dupont C, Coulombel I, Vincent JP, Nicolis I, Benazeth S, Cynober L and Aussel C. Geriatric Nutritional Risk Index: a new index for evaluating at-risk elderly medical patients. Am J Clin Nutr. 2005; 82:777-83.

Supplementary Table S2. Subgroup associations of NT-proBNP with mortality in hospitalized oldest-old patients

| Subgroup categories | N | No of events (%) | HR 95% CI | P-for-interaction |
| --- | --- | --- | --- | --- |
| Men | 272 | 124 (45.6) | 1.27 (1.13, 1.42) | 0.008 |
| Women | 88 | 35 (39.8) | 1.52 (1.21, 1.93) |  |
| eGFR < 60 ml/min/1.73 m2 | 134 | 73 (54.5) | 1.26 (1.11, 1.44) | 0.360 |
| eGFR >= 60 ml/min/1.73 m2 | 226 | 86 (38.1) | 1.38(1.19, 1.59) |  |
| Diabetes mellitus | 119 | 57 (47.9) | 1.45 (1.23, 1.71) | 0.496 |
| Non- diabetes mellitus | 241 | 102 (42.3) | 1.28 (1.12, 1.46) |  |
| BMI < 20 | 67 | 38 (56.7) | 1.25 (1.00, 1.55) | 0.158 |
| BMI >= 20 | 293 | 121 (41.3) | 1.32 (1.18, 1.47) |  |
| Moderate CHF | 173 | 98 (56.6) | 1.28 (1.12, 1.46) | 0.456 |
| Non and mild CHF | 187 | 61 (32.6) | 1.43 (1.19, 1.72) |  |
| Total | 360 | 159 (44.1) | 1.32 (1.20, 1.46) |  |

A significant association between NT-proBNP level and mortality was observed in all subgroups. Hazard ratios (HRs; 95% confidence intervals [95% CIs]) were expressed as doubling increases in the NT-proBNP levels. The HRs were adjusted for age, sex, Charlson comorbidity index, geriatric nutritional risk index, and estimated glomerular filtration rate. CHF, chronic heart failure; eGFR, estimated glomerular filtration rate.

Supplementary Table S3. Sensitivity analyses of NT-proBNP levels with mortality in hospitalized oldest-old patients.

| Item | No | Events (%) | HR 95% CI |
| --- | --- | --- | --- |
| Analysis excluding events in first year | 292 | 91 (31.2) | 1.40 (1.22, 1.61) |
| Analysis excluding events in first two years | 259 | 58 (22.4) | 1.43 (1.20, 1.70) |
| Analysis excluding cancer at baseline | 300 | 127 (42.3) | 1.33 (1.20, 1.49) |

Hazard ratios (HRs; 95% confidence intervals [95% CIs]) were expressed as doubling increases in the NT-proBNP levels. The HRs were adjusted for age, sex, Charlson comorbidity index, geriatric nutritional risk index, and estimated glomerular filtration rate.


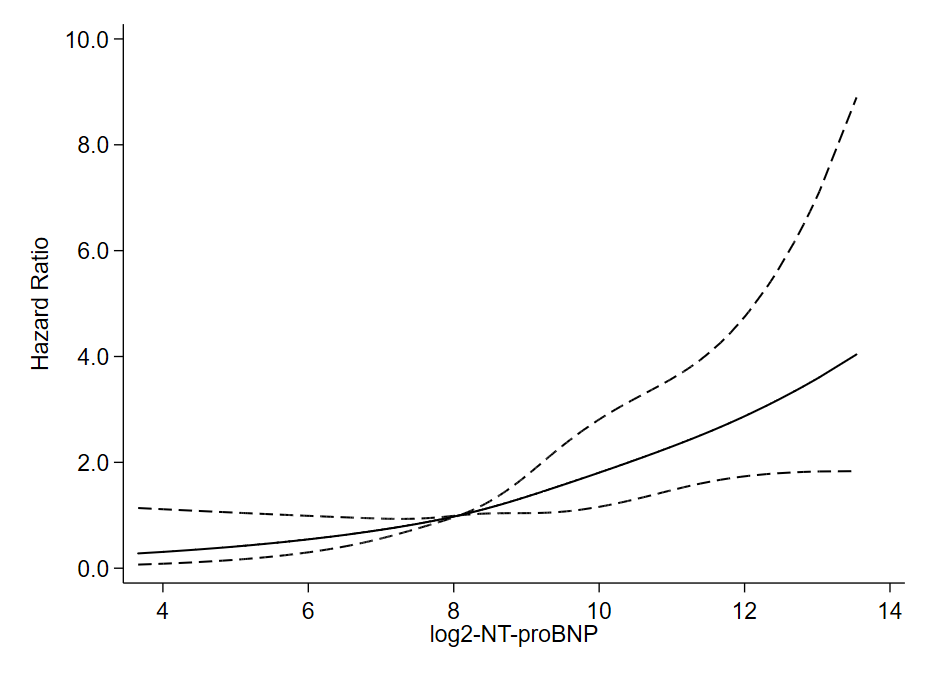


**Figure S1.** Restricted Cubic spline analyses show the relationships between NT-proBNP and mortality. Median NT-proBNP (271.3 pg/ml) is the reference standard. The model was adjusted for age, gender, Charlson comorbidity index, geriatric nutritional risk index, and estimated glomerular filtration rate. Dashed lines indicate 95% confidence intervals.
